# Supplementary material
Source: PubMed Central journal article supplement (PMC4407499)
Supplement: NIHMS669972-supplement-Supplemental_Material.pdf [file NIHMS669972-supplement-Supplemental_Material.pdf]

## Supplementary materials

### Supplementary materials and methods: FGFR expression and copy number analysis

We analyzed copy numbers from exome sequencing with two modifications. First, in the absence of a matched normal sample from a patient, a collection of normal blood samples from other male patients was used as a reference. Specifically, per-exon coverage was summed across 16 exome libraries prepared from normal blood specimens from male patients; per-exon coverage quantifications in the tumor sample were compared with these pooled normal quantifications. Second, presumably because the average ploidy in the tumor samples was greater than 2, median centering was not sufficient to appropriately normalize the  $\log_2$  coverage ratios. Thus, all  $\log_2$  coverage ratios were perturbed by a constant value ( $-0.45$ ) representing a peak of the distribution of coverage ratios.

To choose cutoffs for gain and loss, we assumed that a tumor sample came from a tumor/non-tumor mixture with an unknown tumor fraction between 70% and 100%. For tumor fractions in this range, regions of one-copy loss would then be expected to have  $\log_2$  coverage ratios less than  $\log_2(0.7*1 + 0.3*2) - 1 = -0.62$  and regions of two-copy loss would be expected to have  $\log_2$  coverage ratios less than  $\log_2(0.7*0 + 0.3*2) - 1 = -1.74$ . Nine segments comprised 1794 total exons with  $\log_2$  coverage ratios between  $-1.74$  and  $-0.62$ . The weighted mean of these  $\log_2$  coverage ratios, weighted by the number of exons in each segment, was  $-0.89$  (assuming that segments representing regions of one-copy loss yields a tumor fraction estimate of 92%). Using this estimate, the segment means were transformed into estimates of the number of copies per tumor cell and rounded to the nearest integer to arrive at an estimated number of copies.

Per-exon coverage values were extracted using BEDTools version 2.17.0 software. Downstream segmentation analysis was done with R version 2.15.1 software with the Circular Binary Segmentation algorithm as implemented in the DNACopy package version 1.32.0.

## Supplementary Figures

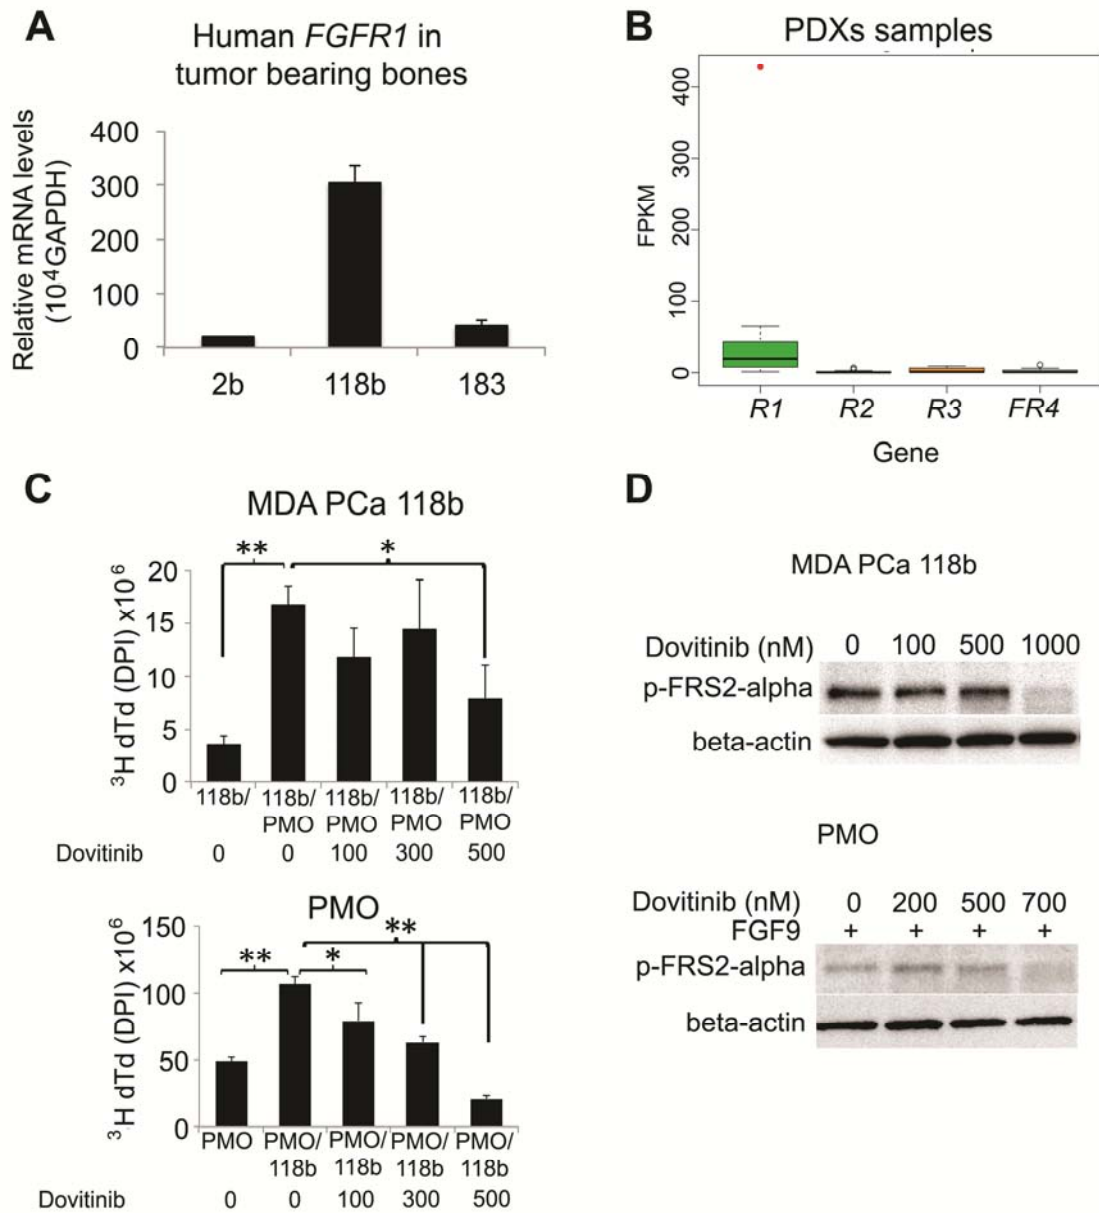

**Fig. S1.** *FGFR* gene family expression in PDXs and the effect of dovitinib on MDA PCa 118b cells *in vitro*. **(A)** Relative expression of human *FGFR1* mRNA in tumor-bearing femurs as assessed by real time RT-PCR analysis (n=6). RNA was isolated from the PCa-bearing femurs of mice by using human-specific primers. 2b, MDA PCa 2b; 118b, MDA PCa 118b; 183, MDA PCa 183. Error bars indicate standard error of the mean (SEM). **(B)** Boxplots showing RNA sequencing gene expression values (RPKM) for *FGFR* family genes in 16 PCa PDX samples. The *FGFR1* outlier, shown as a red dot, is from PDX sample MDA PCa 118b. **(C)** <sup>3</sup>H-Thymidine incorporation into MDA PCa 118b cells (118b) and PMOs grown separately or after 48 h of coculture with varying concentrations of dovitinib; \**P*<0.05; \*\**P*<0.001, two-tailed *t* tests. **(D)** Western blot analysis of PCa cells and PMOs treated with increasing concentrations of dovitinib. β-Actin was used as a loading control.

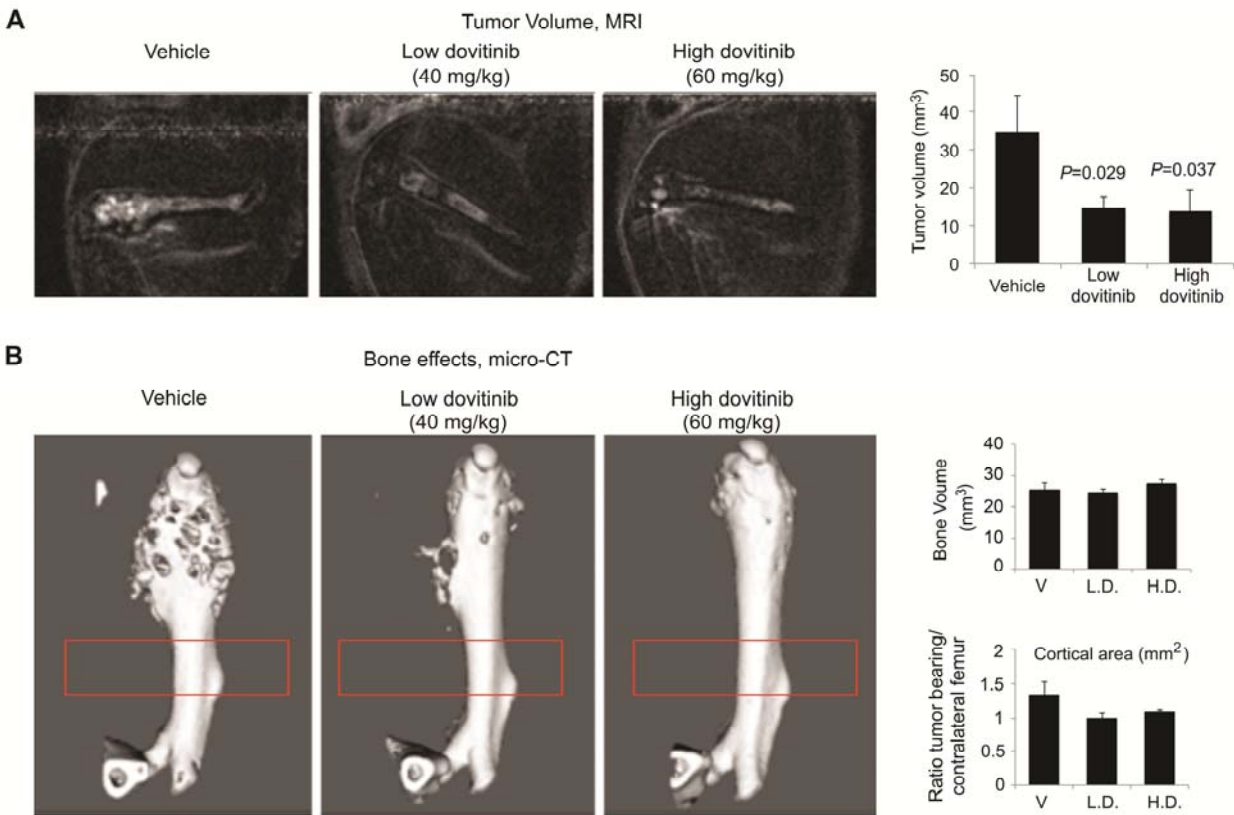

**Fig. S2.** Effect of 3 weeks of dovitinib treatment on mice bearing MDA PCa 118b cells in the right femurs. **(A)** Left: In vivo MR images show that dovitinib inhibited the growth of MDA PCa 118b tumors. Sagittal MR images of MDA PCa 118b-bearing femurs in control and dovitinib-treated mice were acquired with a T2-weighted fast spin echo sequence with fat suppression. Right: Tumor volumes derived from MR images were significantly smaller in treated mice than in control mice, by one-tailed *t* tests. Error bars indicate standard error of the mean (SEM) **(B)** Left: 3D isosurface micro-CT images of tumor-bearing femurs in control and dovitinib-treated mice. The red outline boxes indicate the area used to calculate relative cortical area (illustrated at right). Right upper panel: bone volume of the femur and patella (including woven bone present in tumor). Right lower panel: relative cortical area of a 3-mm midshaft region of the femur of control and dovitinib-treated mice. Values were calculated as a ratio between tumor-bearing femur and contralateral femur of the same mice.  $P=0.034$  by *t*-test comparing cortical area for vehicle vs. two treatment arms pooled together. V, vehicle; L.D. low-dose dovitinib; H.D., high-dose dovitinib. Error bars indicate standard error of the mean (SEM).

## H&E of tumor bearing bone

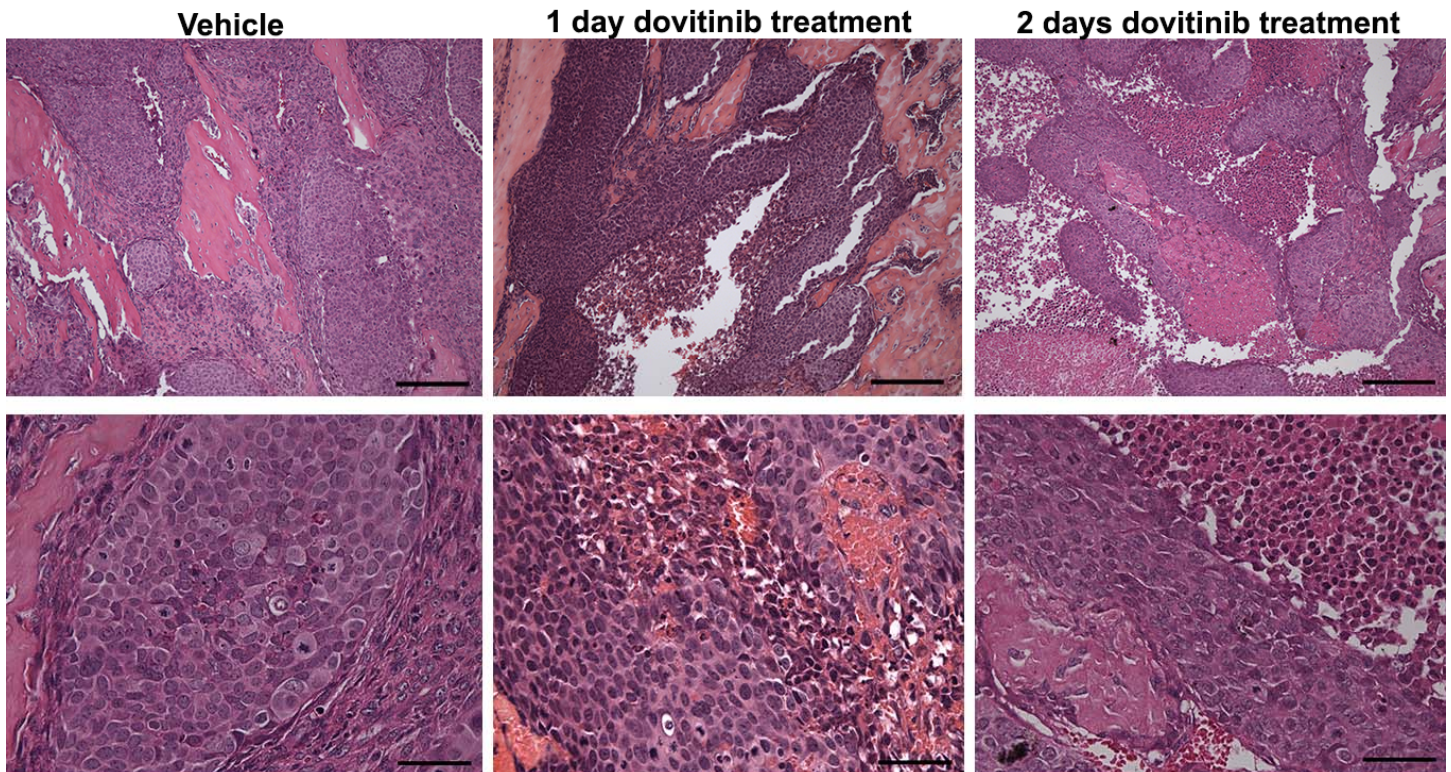

**Fig. S3.** Effects of 1 day and 2 days of dovitinib treatment on MDA PCa 118b bone tumors. Representative H&E-stained sections of MDA PCa 118b cells grown in femurs of mice treated without dovitinib (vehicle; left) or with dovitinib for 1 day (middle) or 2 days (right). Scale bars, 200 µm (top panels) and 50 µm (lower panels).

HIC stains of MDA PCa 118b bone tumors

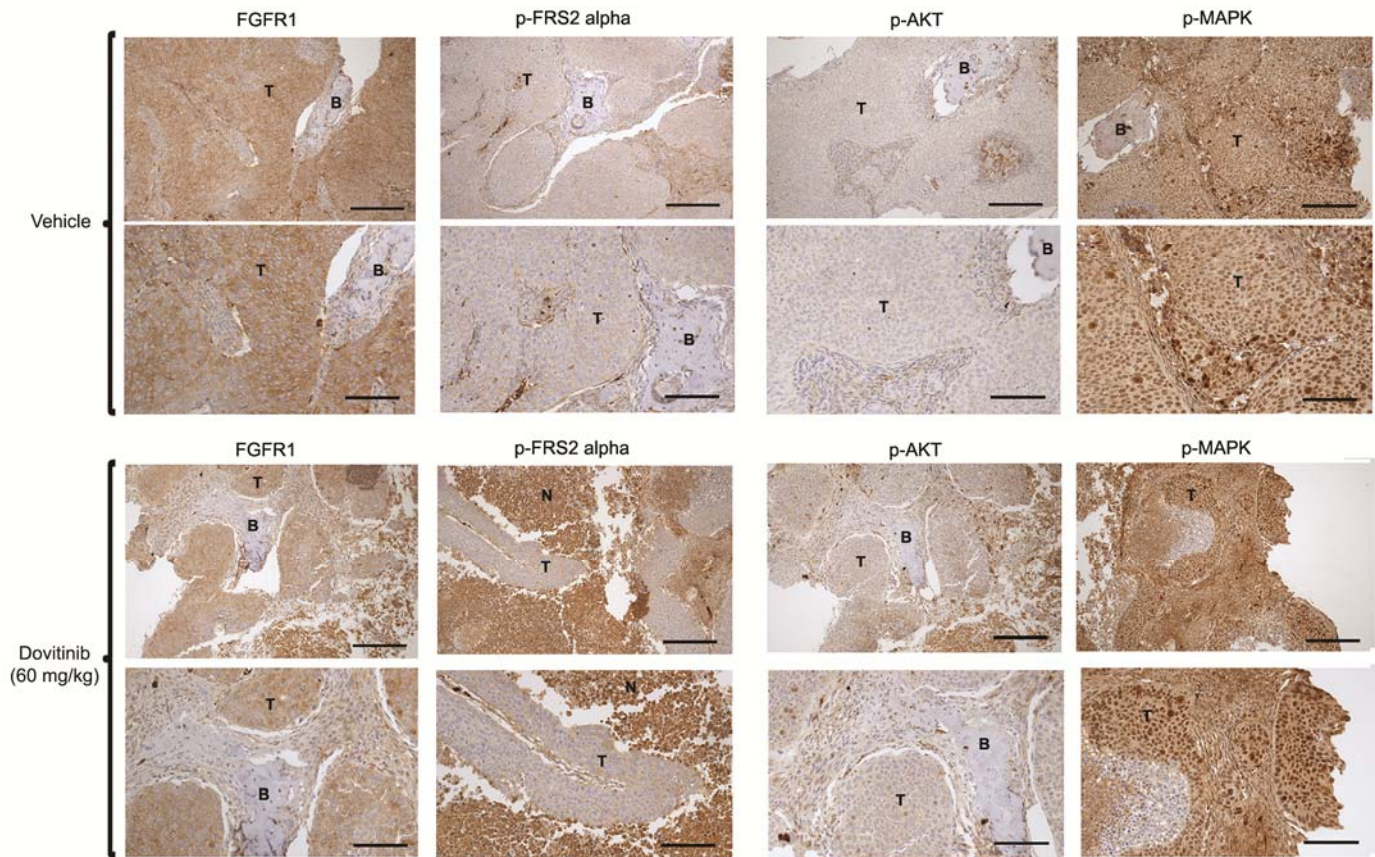

**Fig. S4.** Effects of 7 days of dovitinib treatment on the expression of FGFR1, p-FRS2-alpha, p-AKT, and p-MAPK on MDA PCa 118b bone tumors. Representative immunohistochemical-stained tissue sections of MDA PCa 118b cells grown in femurs of mice treated without dovitinib (vehicle) or with dovitinib for 7 days. T, tumor; B, bone; N, necrosis. Scale bars, 200  $\mu\text{m}$  (top panels) and 50  $\mu\text{m}$  (lower panels) for each set of treated and control conditions.

**A** Mouse genes expression

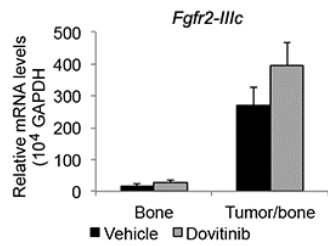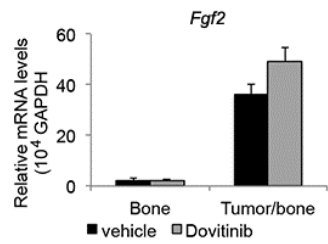

Human genes expression

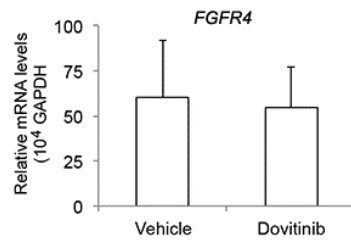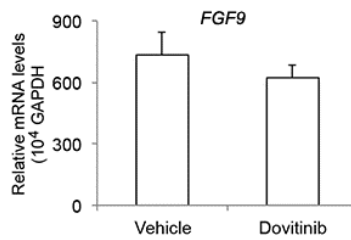

**B**

p-MAPK band density on mouse bone

|                    | Band density in Western blot |       |        |        |                     |        |       |        |
|--------------------|------------------------------|-------|--------|--------|---------------------|--------|-------|--------|
|                    | Vehicle                      |       |        |        | Dovitinib (60mg/kg) |        |       |        |
| Mouse p-MAPK       | V1                           | V2    | V3     | V4     | D1                  | D2     | D3    | D4     |
| eIF4E              | 3282                         | 9268  | 4393   | 11871  | 2957                | 2987   | 3002  | 2984   |
| Ratio p-MAPK/eIF4E | 0.2583                       | 0.697 | 0.3411 | 0.8994 | 0.2449              | 0.2464 | 0.248 | 0.2425 |
| Mean               | 0.55                         |       |        |        | 0.25                |        |       |        |
| SD                 | 0.3                          |       |        |        | 0.002               |        |       |        |
| P                  | 0.09                         |       |        |        |                     |        |       |        |

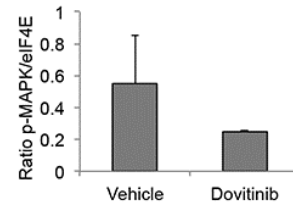

**Fig. S5.** Expression of *Fgfr2-IIIc* and *Fgf2* RNA, *FGFR4* and *FGF9* RNA, and p-MAPK and eIF4E protein in mouse femurs with or without MDA PCa 118b. **(A)** Relative RNA expression of mouse *Fgfr2-IIIc* and *Fgf2* and of human *FGFR4* and *FGF9* in mouse femur with MDA PCa 118b tumor (Tumor/bone) and without tumors (Bone) after 7 days of treatment with dovitinib or vehicle. Real time RT-PCR was done with mouse- and human-specific primers. **(B) Top.** Band densities on western blots of contralateral (non-tumorous) femurs of mice with MDA PCa 118b bone tumors treated for 7 days with vehicle or with dovitinib. Lower rows show ratio of band densities. **Bottom.** Graphic illustration of mean values in the table.

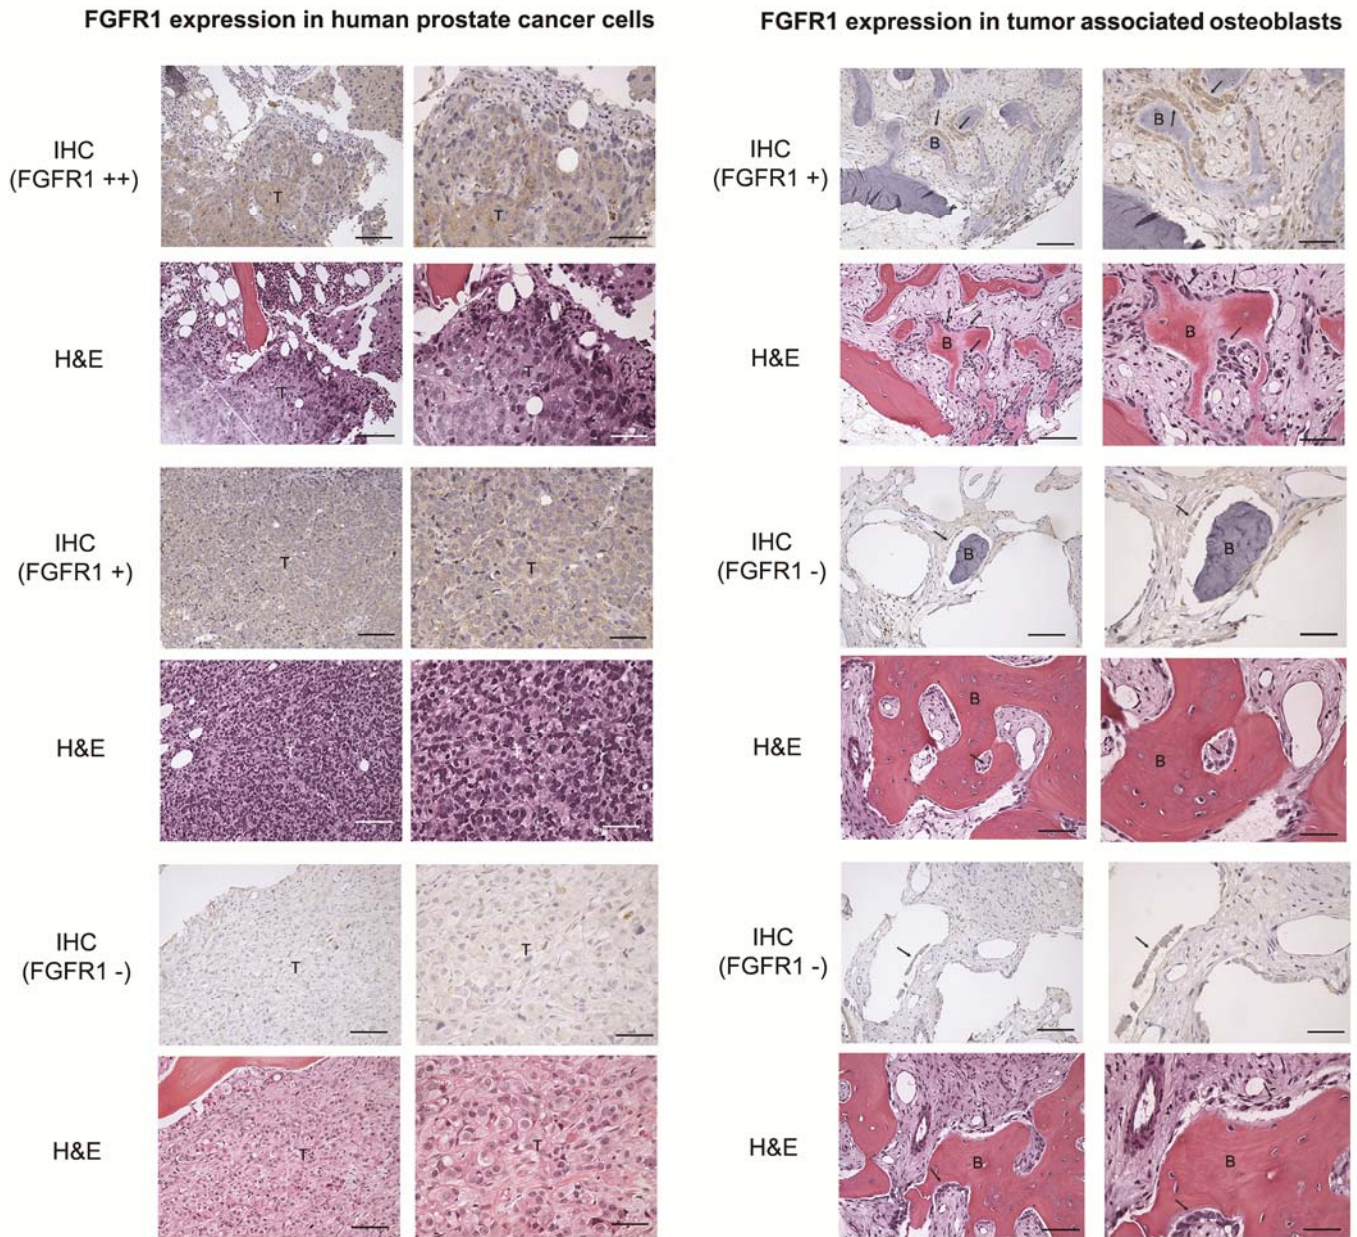

**Fig S6.** Expression of FGFR1 in PCa cells and in tumor-associated osteoblasts in bone biopsy specimens obtained from men in the dovitinib trial before treatment. Representative photomicrographs are shown for immunohistochemical stains with antibody to FGFR1 (Epitomics) and for H&E. Panels under the subheading 'FGFR1 expression in prostate cancer cells' illustrate "++", "+" and "-" results in PCa cells, as indicated in Table S19. Left panels, scale bar indicates 100  $\mu$ m; right panels, 50  $\mu$ m. Panels under 'FGFR1 expression in tumor-associated osteoblasts' illustrate "+" and "-" results, as indicated in Table S19. In cases of "-" results, two different areas containing tumor-associated osteoblasts are shown. Left panels, scale bar indicates 100  $\mu$ m;

right panels, 50  $\mu$ m. T, tumor; B, bone; arrows indicate osteoblasts. Note that the bone tissue had detached in many of the histologic slides with immunohistochemical stains.

**Table S1.** Primer sequences used for RT-PCR

|                  | Primer Name      | Exon       | Primer Sequence               |
|------------------|------------------|------------|-------------------------------|
| Human primers    | hFGF9-257F       | 1          | GGA AAG ACC ACA GCC GAT TT    |
|                  | hFGF9-347R       | 2          | AGG TAG AGT CCA CTG TCC ACG   |
|                  | hFGFR1-894F      | 7a         | CAA GAT TGG CCC AGA CAA CC    |
|                  | hFGFR1-982R      | 8          | AGT GAA GCA CCT CCA TCT CT    |
|                  | hFGFR3-419F      | 3          | AGG CTG AGG ACA CAG GTG TG    |
|                  | hFGFR3-493R      | 4          | CCA GCA GCT TCT TGT CCA TC    |
|                  | hFGFR4-1358F     | 10b        | ATC TAC CTC TCG ACC CAC TA    |
|                  | hFGFR4-1456R     | 11         | CCT CTG CAC GTA CTA CCT GG    |
|                  | hFGFR1-IIIb943F  | 8          | GGA TTA ATA GCT CGG ATG CG    |
|                  | hFGFR1-IIIb1166R | 9          | CAT CTT GTA GAC GAT GAC CGA C |
|                  | hFGFR10IIIc965F  | 8          | GAT GGA GGT GCT TCA CTT AAG A |
|                  | hFGFR1-IIIc1197R | 9          | CAT CTT GTA GAC GAT GAC CGA C |
|                  | Mouse primers    | mFGF2-249F |                               |
| mFGF2-368R       |                  |            | TAC CAA CTG GAG TAT TTC CG    |
| mFGFR1-894F      |                  | 7          | TAA GAT CGG GCC AGA CAA CT    |
| mFGFR1-982R      |                  | 8          | GAT GAA GCA CCT CCA TTT CC    |
| mFGFR2IIIc-1025F |                  | 9          | GCT TGG CGG GTA ATT CTA TT    |
| mFGFR2IIIc-1112R |                  | 10         | GCT GTA ATC TCC TTT TCT CT    |
| mFGFR3-383F      |                  | 4          | CCT CAG GAG ATG ACG AAG AT    |
| mFGFR3-475R      |                  | 5          | CCA GCA GTT TCT TAT CCA TT    |
| mFGFR4-1349F     |                  | 10         | ACC TGC CTC TCG ATC CGC TT    |
| mFGFR4-1447R     |                  | 11         | CCT CTG CAC GAA CCA CTT GC    |
| mFGFR1-IIIb943F  |                  | 11         | GAA TTA ATA GCT CGG ATG CG    |
| mFGFR1-IIIb1103R |                  | 12         | ATA GAT GAT GAC AGA GCC CAA   |
| mFGFR1-IIIc965F  |                  | 11         | AAT GGA GGT GCT TCA TCT ACG G |
| mFGFR1-IIIc1134R |                  | 12         | AAT GAT CTC CAG GTA GAG CGG T |



| <b>Table S2. Quantitative RT-PCR results.</b> |                                  |                                              |
|-----------------------------------------------|----------------------------------|----------------------------------------------|
| <b>Gene</b>                                   | <b>Primary mouse osteoblasts</b> | <b>PC3 (human prostate cancer cell line)</b> |
| <i>Fgfr1</i>                                  | 481.6 +/- 34.1                   | Undetectable                                 |
| <i>FGFR1</i>                                  | Undetectable                     | 86.2 +/- 9.6                                 |
| <i>Fgfr2 IIIc</i>                             | 485.5 +/- 24.3                   | Undetectable                                 |
| <i>FGFR2 IIIc</i>                             | 0.12 +/-0.02                     | 4.6 +/- 0.2                                  |
| <i>Fgfr3</i>                                  | 9.9 +/- 0.6                      | Undetectable                                 |
| <i>FGFR3</i>                                  | 1.02 +/- 0.2                     | 5.8 +/- 0.3                                  |
| <i>Fgfr4</i>                                  | 3.4 +/- 0.3                      | Undetectable                                 |
| <i>FGFR4</i>                                  | Undetectable                     | 145.3 +/- 11.7                               |
| <i>Fgf2</i>                                   | 382.1 +/- 0.3                    | Undetectable                                 |
| <i>FGF2</i>                                   | Undetectable                     | 78.3 +/- 3.8                                 |
| <i>Fgf9</i>                                   | Undetectable                     | Undetectable                                 |
| <i>FGF9</i>                                   | Undetectable                     | 0.41 +/- 0.3                                 |
| <i>Fgfr1-IIIb</i>                             | 0.29 +/- 0.29                    | Undetectable                                 |
| <i>FGFR1-IIIb</i>                             | Undetectable                     | Undetectable                                 |
| <i>Fgfr1-IIIc</i>                             | 3035.29 +/- 170                  | Undetectable                                 |
| <i>FGFR1-IIIc</i>                             | Undetectable                     | 82.5 +/- 25                                  |

**Table S3.** Relative mRNA levels of FGF family members in bone with and without tumors. The mRNA levels were normalized to  $10^4$  *Gapdh* in tumor-bearing bone (tumor/bone) and contralateral bone.

| MDA PCa 2b   |              |                |              |                |                  |                |              |                |               |                |
|--------------|--------------|----------------|--------------|----------------|------------------|----------------|--------------|----------------|---------------|----------------|
| Sample ID    | <i>Fgf2</i>  |                | <i>Fgfr1</i> |                | <i>Fgfr2IIIc</i> |                | <i>Fgfr3</i> |                | <i>Fgfr4</i>  |                |
|              | Bone         | Tumor/<br>bone | Bone         | Tumor/<br>bone | Bone             | Tumor/<br>bone | Bone         | Tumor/<br>bone | Bone          | Tumor/<br>bone |
|              | T-mean       | T-mean         | T-mean       | T-mean         | T-mean           | T-mean         | T-mean       | T-mean         | T-mean        | T-mean         |
| Mouse 1      | 9.28         | 273.01         | 30.67        | 547.72         | 38.47            | 238.11         | 7.52         | 10.95          | 153.61        | 12.50          |
| Mouse 2      | 6.08         | 112.00         | 33.80        | 431.93         | 30.14            | 57.28          | 3.01         | 15.52          | 286.77        | 16.65          |
| Mouse 3      | 12.30        | 163.67         | 41.31        | 572.52         | 47.28            | 54.50          | 11.45        | 28.48          | 152.01        | 11.82          |
| Mouse 4      | 21.79        | 151.17         | 93.66        | 542.94         | 71.17            | 62.48          | 13.88        | 19.53          | 152.55        | 18.47          |
| Mouse 5      | 22.79        | 177.17         | 112.42       | 400.19         | 115.58           | 147.91         | 6.66         | 26.03          | 351.87        | 36.43          |
| Mouse 6      | 28.44        | 114.07         | 76.03        | 637.31         | 104.77           | 339.74         | 9.39         | 29.40          | 372.48        | 20.68          |
| <b>Mean</b>  | 16.78        | 165.18         | 64.65        | 522.10         | 67.90            | 150.00         | 8.65         | 21.65          | 244.88        | 19.43          |
| <b>SE</b>    | 3.60         | 24.09          | 14.03        | 36.47          | 14.56            | 48.01          | 1.56         | 3.07           | 42.80         | 3.67           |
| <b>P</b>     | 0.0021       |                | 0.0001       |                | 0.11             |                | 0.006        |                | 0.0025        |                |
| MDA PCa 118b |              |                |              |                |                  |                |              |                |               |                |
| Sample ID    | <i>Fgf2</i>  |                | <i>Fgfr1</i> |                | <i>Fgfr2IIIc</i> |                | <i>Fgfr3</i> |                | <i>Fgfr4</i>  |                |
|              | Bone         | Tumor/<br>bone | Bone         | Tumor/<br>bone | Bone             | Tumor/<br>bone | Bone         | Tumor/<br>bone | Bone          | Tumor/<br>bone |
|              | T-mean       | T-mean         | T-mean       | T-mean         | T-mean           | T-mean         | T-mean       | T-mean         | T-mean        | T-mean         |
| Mouse 7      | 18.68        | 152.99         | 176.58       | 800.35         | 330.41           | 407.29         | 3.81         | 7.45           | 180.55        | 10.67          |
| Mouse 8      | 10.77        | 90.05          | 67.52        | 329.19         | 148.95           | 395.79         | 3.34         | 6.83           | 186.47        | 8.02           |
| Mouse 9      | 47.93        | 66.04          | 230.44       | 788.40         | 284.72           | 486.84         | 6.38         | 4.50           | 342.34        | 27.64          |
| Mouse 10     | 36.97        | 92.27          | 269.84       | 813.10         | 218.09           | 368.29         | 5.72         | 6.21           | 423.95        | 7.85           |
| Mouse 11     | 38.31        | 81.44          | 202.91       | 347.03         | 383.63           | 320.18         | 6.75         | 3.99           | 383.63        | 35.04          |
| Mouse 12     | 24.68        | 75.51          | 171.14       | 805.25         | 339.57           | 528.01         | 3.61         | 13.02          | 120.54        | 10.28          |
| <b>Mean</b>  | 29.56        | 93.05          | 186.40       | 647.22         | 284.23           | 417.73         | 4.93         | 7.00           | 272.91        | 16.58          |
| <b>SE</b>    | 5.67         | 12.62          | 28.07        | 97.83          | 35.47            | 31.35          | 0.62         | 1.32           | 51.35         | 4.79           |
| <b>P</b>     | 0.011        |                | 0.0027       |                | 0.033            |                | 0.30         |                | 0.0034        |                |
| MDA PCa 183  |              |                |              |                |                  |                |              |                |               |                |
| Sample ID    | <i>Fgf2</i>  |                | <i>Fgfr1</i> |                | <i>Fgfr2IIIc</i> |                | <i>Fgfr3</i> |                | <i>Fgfr4</i>  |                |
|              | Bone         | Tumor/<br>bone | Bone         | Tumor/<br>bone | Bone             | Tumor/<br>bone | Bone         | Tumor/<br>bone | Bone          | Tumor/<br>bone |
|              | T-mean       | T-mean         | T-mean       | T-mean         | T-mean           | T-mean         | T-mean       | T-mean         | T-mean        | T-mean         |
| Mouse 13     | 20.39        | 134.27         | 59.34        | 651.68         | 67.74            | 366.76         | 6.63         | 20.05          | 217.65        | 11.41          |
| Mouse 14     | 21.18        | 287.62         | 68.97        | 879.79         | 62.59            | 769.68         | 4.16         | 26.09          | 511.24        | 8.45           |
| Mouse 15     | 6.18         | 419.56         | 43.50        | 1127.24        | 59.79            | 1267.08        | 5.29         | 26.51          | 456.01        | 6.51           |
| Mouse 16     | 14.38        | 349.56         | 45.40        | 1251.47        | 56.29            | 1046.63        | 4.51         | 35.80          | 326.55        | 27.04          |
| Mouse 17     | 12.15        | 419.58         | 43.94        | 1926.68        | 69.98            | 1203.25        | 8.91         | 43.19          | 407.15        | 21.07          |
| <b>Mean</b>  | <b>14.86</b> | <b>322.12</b>  | <b>52.23</b> | <b>1167.37</b> | <b>63.28</b>     | <b>930.68</b>  | <b>5.90</b>  | <b>30.33</b>   | <b>383.72</b> | <b>14.90</b>   |
| <b>SE</b>    | 2.77         | 53.02          | 5.11         | 216.09         | 2.51             | 165.05         | 0.87         | 4.08           | 51.42         | 3.93           |
| <b>P</b>     | 0.005        |                | 0.007        |                | 0.006            |                | 0.002        |                | 0.002         |                |

T-mean is mean of technical duplicates

**Table S4.** Relative mouse *Fgfr1-IIIc* mRNA levels. The mRNA levels were normalized to  $10^4$  Gapdh in MDA PCa 2b tumor-bearing bone (tumor/bone) and contralateral (sham injected) bone.

| MDA PCa 2b        |          |         |         |               | MDA PCa 118b      |          |         |         |               |
|-------------------|----------|---------|---------|---------------|-------------------|----------|---------|---------|---------------|
| Mouse ID          | Test 1   | Test 2  | T-Mean  | Sample ID     | Test 1            | Test 2   | T-mean  |         |               |
| <b>Tumor/bone</b> | Mouse 1  | 1241.37 | 1695.76 | 1468.56       | <b>Tumor/bone</b> | Mouse 13 | 1377.38 | 2206.76 | 1792.07       |
|                   | Mouse 2  | 1103.38 | 1571.27 | 1337.32       |                   | Mouse 14 | 620.68  | 853.78  | 737.23        |
|                   | Mouse 3  | 476.96  | 633.72  | 555.34        |                   | Mouse 15 | 727.96  | 1001.34 | 864.65        |
|                   | Mouse 4  | 774.82  | 915.05  | 844.94        |                   | Mouse 16 | 131.39  | 191.04  | 161.21        |
|                   | Mouse 5  | 722.93  | 842.02  | 782.48        |                   | Mouse 17 | 1001.34 | 1406.32 | 1203.83       |
|                   | Mouse 6  | 607.91  | 555.53  | 581.72        |                   | Mouse 18 | 638.13  | 612.14  | 625.14        |
|                   | Mean     |         |         | 928.39        |                   | Mean     |         |         | 897.35        |
|                   | SE       |         |         | 157.76        |                   | SE       |         |         | 226.36        |
| <b>Bone</b>       | Mouse 7  | 105.98  | 184.53  | 145.26        | <b>Bone</b>       | Mouse 19 | 40.16   | 87.90   | 64.03         |
|                   | Mouse 8  | 96.85   | 91.63   | 94.24         |                   | Mouse 20 | 92.27   | 100.27  | 96.27         |
|                   | Mouse 9  | 68.96   | 87.90   | 78.43         |                   | Mouse 21 | 96.18   | 127.80  | 111.99        |
|                   | Mouse 10 | 80.88   | 138.88  | 109.88        |                   | Mouse 22 | 74.42   | 104.53  | 89.48         |
|                   | Mouse 11 | 361.47  | 392.82  | 377.14        |                   | Mouse 23 | 240.14  | 149.89  | 195.01        |
|                   | Mouse 12 | 241.81  | 231.96  | 236.88        |                   | Mouse 24 | 66.15   | 44.25   | 55.20         |
|                   | Mean     |         |         | 173.64        |                   | Mean     |         |         | 102.00        |
|                   | SE       |         |         | 46.78         |                   | SE       |         |         | 20.47         |
| <i>P</i>          |          |         |         | <b>0.0078</b> | <i>P</i>          |          |         |         | <b>0.0166</b> |

Test 1 and Test 2 are technical duplicates, T-mean is mean of technical duplicates

| MDA PCa 183       |          |        |        |               |
|-------------------|----------|--------|--------|---------------|
| Mouse ID          | Test 1   | Test 2 | T-mean |               |
| <b>Tumor/bone</b> | Mouse 25 | 497    | 796    | 646.50        |
|                   | Mouse 26 | 872    | 1065   | 968.50        |
|                   | Mouse 27 | 824    | 1182   | 1003.00       |
|                   | Mean     |        |        | 872.67        |
|                   | SE       |        |        | 113.52        |
| <b>Bone</b>       | Mouse 28 | 52     | 62     | 57.00         |
|                   | Mouse 29 | 30     | 29     | 29.50         |
|                   | Mouse 30 | 23     | 48     | 35.50         |
|                   | Mean     |        |        | 40.67         |
|                   | SE       |        |        | 8.35          |
| <i>P</i>          |          |        |        | <b>0.0207</b> |

Test 1 and Test 2 are technical duplicates, T-mean is mean of technical duplicates

**Table S5.** Relative mRNA levels of *FGFR-IIIb* and *FGFR1-IIIc* in MDA PCa 2b tumor-bearing bone. The levels were normalized to 104 Gapdh.

| MDA PCa 2b                                        |                   |      |                   |     |
|---------------------------------------------------|-------------------|------|-------------------|-----|
| Sample ID                                         | <i>FGFR1-IIIb</i> |      | <i>FGFR1-IIIc</i> |     |
|                                                   | Mean              | SD   | Mean              | SD  |
| M2b-1                                             | 0.3               | 1.14 | 26                | 3   |
| M2b-2                                             | 0.2               | 0.01 | 20                | 2   |
| M2b-3                                             | 0.5               | 0.14 | 28                | 3   |
| MDA PCa 118b                                      |                   |      |                   |     |
|                                                   | <i>FGFR1-IIIb</i> |      | <i>FGFR1-IIIc</i> |     |
|                                                   | Mean              | SD   | Mean              | SD  |
| M118b-1                                           | 0.6               | 0.15 | 75                | 16  |
| M118b-2                                           | 5.5               | 0.4  | 240               | 5   |
| M118b-3                                           | 10                | 1.4  | 615               | 110 |
| MDA PCa 183                                       |                   |      |                   |     |
|                                                   | <i>FGFR- IIIb</i> |      | <i>FGFR1-IIIc</i> |     |
|                                                   | Mean              | SD   | Mean              | SD  |
| M183-1                                            | 0.5               | 0.1  | 27                | 1   |
| M183-2                                            | 0.24              | 0.1  | 29                | 4   |
| M183-3                                            | 2.4               | 0.1  | 244               | 39  |
| Values are Mean and SD of experimental duplcates. |                   |      |                   |     |

**Table S6.** Expression of *FGFR1* in prostate and prostate cancer tissues, xenografts, and cell lines

| <b>Reads per kilobase per million [RPKM]</b> | <b>Prostate cancer specimens* (n=136)</b> | <b>Benign prostate tissues next to pCa (n=19)</b> | <b>Patient-derived xenografts (PDX) (n=17)</b> | <b>Prostate cancer cell lines (n=10)</b> |
|----------------------------------------------|-------------------------------------------|---------------------------------------------------|------------------------------------------------|------------------------------------------|
| More than 100                                | 7 (5%)                                    | 2 (11%)                                           | 1 (6%)                                         | 0                                        |
| 50-100                                       | 32 (24%)                                  | 8 (42%)                                           | 2 (12%)                                        | 3 (30%)                                  |
| 20-50                                        | 63 (46%)                                  | 7 (37%)                                           | 6 (35%)                                        | 2 (20%)                                  |
| 10-20                                        | 26 (19%)                                  | 2 (10%)                                           | 3 (18%)                                        | 2 (20%)                                  |
| Less than 10                                 | 8 (6%)                                    | 0                                                 | 5 (29%)                                        | 3 (30%)                                  |

\*From primary tumors and non-bone metastases.

**Table S8.** Relative *Fgfr1* mRNA levels in MDA PCa 118b tumor-bearing bone. The levels were compared contralateral (sham-injected) bone of mice treated with vehicle or dovitinib and normalized to 10<sup>4</sup> GAPDH

| Sample ID                                                |            | <i>Fgfr1</i>   |      |                    |        | <i>FGFR1</i>      |       |
|----------------------------------------------------------|------------|----------------|------|--------------------|--------|-------------------|-------|
|                                                          |            | Bone           |      | Tumor/bone         |        | Tumor/bone        |       |
|                                                          |            | T-mean         | T-SD | T-mean             | T-SD   | T-mean            | T-SD  |
| Vehicle                                                  | Mouse 1    | 65.05          | 2.87 | 1434.83            | 402.48 | 932               | 50.21 |
|                                                          | Mouse 2    | 7.55           | 0.85 | 677.06             | 23.22  | 809               | 71.31 |
|                                                          | Mouse 3    | 8.81           | 2.76 | 670.47             | 88.46  | 1200              | 47.02 |
|                                                          | Mouse 4    | 4.43           | 1.14 | 1150.35            | 22.55  | 1314              | 90.07 |
|                                                          | Mean<br>SE | 21.46<br>14.56 |      | 983.1775<br>187.84 |        | 1063.75<br>116.70 |       |
| Sample ID                                                |            | T-mean         | T-SD | T-mean             | T-SD   | T-mean            | T-SD  |
| Dovitinib                                                | Mouse 5    | 28.9           | 0.99 | 369.06             | 61.22  | 164               | 23.99 |
|                                                          | Mouse 6    | 17.19          | 2.9  | 253.00             | 39.62  | 343.00            | 40.27 |
|                                                          | Mouse 7    | 16.86          | 1.56 | 248.66             | 99.57  | 345.00            | 16.88 |
|                                                          | Mouse 8    | 24.05          | 0.71 | 418.82             | 77.56  | 583.00            | 17.15 |
|                                                          | Mean<br>SE | 21.75<br>2.90  |      | 322.385<br>42.55   |        | 358.75<br>171.90  |       |
| <i>P</i>                                                 |            |                |      | <b>0.0139</b>      |        | <b>0.0028</b>     |       |
| T-mean and T-SD are means and SD of technical duplicates |            |                |      |                    |        |                   |       |

| <b>Table S9.</b> Growth plate and growth-plate-to-tumor distance in MDA PCa 118b tumor-bearing bone. The distances were compared to contralateral (sham-injected) bone of mice treated with vehicle or dovitinib |          |                                                      |             |                                                                                       |
|------------------------------------------------------------------------------------------------------------------------------------------------------------------------------------------------------------------|----------|------------------------------------------------------|-------------|---------------------------------------------------------------------------------------|
| <b>Mouse ID</b>                                                                                                                                                                                                  |          | <b>Growth plate width (<math>\mu\text{m}</math>)</b> |             | <b>Growth plate to tumor boundary distance (<math>\mu\text{m}</math>)<sup>1</sup></b> |
|                                                                                                                                                                                                                  |          | <b>Tumor/bone</b>                                    | <b>Bone</b> | <b>Tumor/bone</b>                                                                     |
| Vehicle                                                                                                                                                                                                          | Mouse 1  | 107.875493                                           | 104.404961  | 194.28251                                                                             |
|                                                                                                                                                                                                                  | Mouse 2  | 103.587525                                           | 108.508409  | 2294.0817                                                                             |
|                                                                                                                                                                                                                  | Mouse 3  | 106.974765                                           | 105.089783  | 559.107768                                                                            |
|                                                                                                                                                                                                                  | Mouse 4  | 93.405455                                            | 121.570045  | 59.767309                                                                             |
|                                                                                                                                                                                                                  | Mouse 5  | 123.698569                                           | 117.252708  | 132.167605                                                                            |
|                                                                                                                                                                                                                  | Mouse 6  | 115.464942                                           | 121.196652  | 224.945946                                                                            |
|                                                                                                                                                                                                                  | Mouse 7  | 119.422147                                           | 110.636258  | 614.638238                                                                            |
|                                                                                                                                                                                                                  | Mouse 8  | 127.151142                                           | 114.628284  | 641.153296                                                                            |
|                                                                                                                                                                                                                  | Mean     | 112.20                                               | 112.91      | 590.02                                                                                |
|                                                                                                                                                                                                                  | SE       | 3.99                                                 | 2.40        | 256.65                                                                                |
| Dovitinib                                                                                                                                                                                                        |          | Tumor/bone                                           | Bone        | Tumor/bone                                                                            |
|                                                                                                                                                                                                                  | Mouse 9  | 126.956761                                           | 192.71832   | 484.822467                                                                            |
|                                                                                                                                                                                                                  | Mouse 10 | 243.152194                                           | 190.218118  | 910.068076                                                                            |
|                                                                                                                                                                                                                  | Mouse 11 | 248.679139                                           | 183.143405  | 145.21193                                                                             |
|                                                                                                                                                                                                                  | Mouse 12 | 230.4684                                             | 184.339013  | 771.537902                                                                            |
|                                                                                                                                                                                                                  | Mouse 13 | 335.837736                                           | 311.25522   | 810.466255                                                                            |
|                                                                                                                                                                                                                  | Mouse 14 | 466.897715                                           | 348.303455  | 1435.080923                                                                           |
|                                                                                                                                                                                                                  | Mouse 15 | 380.068954                                           | 306.727494  | 668.129205                                                                            |
|                                                                                                                                                                                                                  | Mouse 16 | 391.117844                                           | 303.917094  | 425.374364                                                                            |
|                                                                                                                                                                                                                  | Mean     | 302.90                                               | 252.58      | 706.34                                                                                |
| SE                                                                                                                                                                                                               | 38.83    | 25.04                                                | 135.75      |                                                                                       |

<sup>1</sup>Values are the average distance between the growth plate of the femoral distal metaphysis and the tumor boundary. Distance to the tumor front boundary was measured approximately every 50  $\mu\text{m}$  along the entire growth plate.

| <b>Table S10.</b> Serum FGF23 levels in MDA PCa 118b tumor-bearing mice treated with vehicle or dovitinib |        |        |        |           |        |        |        |
|-----------------------------------------------------------------------------------------------------------|--------|--------|--------|-----------|--------|--------|--------|
| Vehicle                                                                                                   |        |        |        | Dovitinib |        |        |        |
| Sample ID                                                                                                 | Test 1 | Test 2 | T-mean | Sample ID | Test 1 | Test 2 | T-mean |
| Mouse 1                                                                                                   | 0.91   | 1.55   | 1.23   | Mouse 9   | 1.62   | 1.04   | 1.33   |
| Mouse 2                                                                                                   | 0      | 0.27   | 0.135  | Mouse 10  | 0.85   | 0.52   | 0.685  |
| Mouse 3                                                                                                   | 0.14   | 0.39   | 0.265  | Mouse 11  | 0.78   | 0.52   | 0.65   |
| Mouse 4                                                                                                   | 0      | 0      | 0      | Mouse 12  | 0.78   | 0.59   | 0.685  |
| Mouse 5                                                                                                   | 0.33   | 0      | 0.165  | Mouse 13  | 1.17   | 1.1    | 1.135  |
| Mouse 6                                                                                                   | 0      | 0      | 0      | Mouse 14  | 2.46   | 2.07   | 2.265  |
| Mouse 7                                                                                                   | 1.17   | 0      | 0.585  | Mouse 15  | 1.43   | 1.36   | 1.395  |
| Mouse 8                                                                                                   | 0.27   | 0      | 0.135  |           |        |        |        |
| Mean                                                                                                      |        |        | 0.31   |           |        | 1.16   |        |
| SE                                                                                                        |        |        | 0.41   |           |        | 0.58   |        |
| <i>P</i>                                                                                                  |        |        |        |           |        | 0.0058 |        |
| Test 1 and Test 2 are technical duplicates. T-mean is the mean of technical duplicates                    |        |        |        |           |        |        |        |

| <b>Table S11.</b> Band intensities on western blots of mouse femurs |                  |                  |                                          |           |                  |                  |                                          |
|---------------------------------------------------------------------|------------------|------------------|------------------------------------------|-----------|------------------|------------------|------------------------------------------|
| Vehicle                                                             |                  |                  |                                          | Dovitinib |                  |                  |                                          |
| Sample ID                                                           | p-FRS2- $\alpha$ | T-FRS2- $\alpha$ | Ratio p-FRS2- $\alpha$ /T-FRS2- $\alpha$ | Sample ID | p-FRS2- $\alpha$ | T-FRS2- $\alpha$ | Ratio p-FRS2- $\alpha$ /T-FRS2- $\alpha$ |
| Mouse 1                                                             | 3772.56          | 5758.15          | 0.66                                     | Mouse 5   | 861.52           | 9325.78          | 0.09                                     |
| Mouse 2                                                             | 4521.69          | 8364.78          | 0.54                                     | Mouse 6   | 1190.47          | 7593.76          | 0.16                                     |
| Mouse 3                                                             | 4126.69          | 5801.05          | 0.71                                     | Mouse 7   | 575.74           | 9360.24          | 0.06                                     |
| Mouse 4                                                             | 4186.03          | 7416.29          | 0.56                                     | Mouse 8   | 765.92           | 14119.78         | 0.05                                     |
| Mean                                                                |                  |                  | 0.62                                     |           |                  |                  | 0.09                                     |
| SD                                                                  |                  |                  | 0.08                                     |           |                  |                  | 0.05                                     |



**Table S12.** Bone histomorphometric analysis of contralateral (non-tumorous) femurs of mice with MDA PCa 118b bone tumors

| Vehicle   |                           |            | Dovitinib |                           |            |
|-----------|---------------------------|------------|-----------|---------------------------|------------|
| Sample ID | BS/BV (mm <sup>-1</sup> ) | Tb.Th (μm) | Sample ID | BS/BV (mm <sup>-1</sup> ) | Tb.Th (μm) |
| Mouse 1   | 64.04                     | 31.23      | Mouse 9   | 58.75                     | 34.04      |
| Mouse 2   | 34.30                     | 58.31      | Mouse 10  | 28.26                     | 70.78      |
| Mouse 3   | 67.97                     | 29.42      | Mouse 11  | 60.99                     | 32.79      |
| Mouse 4   | 70.65                     | 28.31      | Mouse 12  | 43.26                     | 46.23      |
| Mouse 5   | 60.22                     | 33.21      | Mouse 13  | 42.62                     | 46.93      |
| Mouse 6   | 72.26                     | 27.67      | Mouse 14  | 28.20                     | 70.92      |
| Mouse 7   | 55.02                     | 36.35      | Mouse 15  | 46.99                     | 42.56      |
| Mouse 8   | 66.94                     | 29.87      | Mouse 16  | 47.47                     | 42.13      |
| Mean      | 61.42                     | 34.30      | Mean      | 44.57                     | 48.30      |
|           |                           |            | T-Test    | 0.015                     | 0.044      |

**Table S13.** Micro-CT analysis of femurs of mice treated with vehicle or dovitinib for 4 weeks

| Vehicle   |           |           | Dovitinib |           |           |
|-----------|-----------|-----------|-----------|-----------|-----------|
| Sample ID | TRI-BS/BV | TRI-Tb.Th | Sample ID | TRI-BS/BV | TRI-Tb.Th |
| Mouse 1   | 44.20     | 0.0453    | Mouse 9   | 31.28     | 0.063     |
| Mouse 2   | 33.02     | 0.0606    | Mouse 10  | 30.06     | 0.066     |
| Mouse 3   | 42.93     | 0.0466    | Mouse 11  | 38.39     | 0.052     |
| Mouse 4   | 46.18     | 0.0433    | Mouse 12  | 38.52     | 0.051     |
| Mouse 5   | 50.38     | 0.0397    | Mouse 13  | 42.23     | 0.047     |
| Mouse 6   | 50.22     | 0.0398    | Mouse 14  | 43.31     | 0.046     |
| Mouse 7   | 45.96     | 0.0435    | Mouse 15  | 33.70     | 0.059     |
| Mouse 8   | 45.18     | 0.0443    | Mouse 16  | 38.61     | 0.051     |
| Mean      | 44.76     | 0.045     |           | 37.013    | 0.055     |
| SE        | 5.43      | 0.0067    |           | 4.87      | 0.0075    |
| <i>P</i>  |           |           |           | 0.0095    | 0.018     |

**Table S14.** Tumor volume of MDA PCa 118b tumor-bearing mice assessed by MRI. Tumor volume was determined by fat-suppressed T2-weighted fast-spin echo MRI after 7 days of dovitinib treatment.

| Vehicle                                                               |                                 | Low dovitinib dose (40 mg/kg) |                                 | High dovitinib dose (60 mg/kg) |                                 |
|-----------------------------------------------------------------------|---------------------------------|-------------------------------|---------------------------------|--------------------------------|---------------------------------|
| Sample ID                                                             | Tumor Volume (mm <sup>3</sup> ) | Sample ID                     | Tumor Volume (mm <sup>3</sup> ) | Sample ID                      | Tumor Volume (mm <sup>3</sup> ) |
| Mouse 1                                                               | 8.40                            | Mouse 13                      | 9.79                            | Mouse 26                       | 64.64                           |
| Mouse 2                                                               | 40.84                           | Mouse 14                      | 26.07                           | Mouse 27                       | 1.57                            |
| Mouse 3                                                               | 53.06                           | Mouse 15                      | 26.83                           | Mouse 28                       | 17.67                           |
| Mouse 4                                                               | 15.83                           | Mouse 16                      | 13.42                           | Mouse 29                       | 3.39                            |
| Mouse 5                                                               | 8.19                            | Mouse 17                      | 5.44                            | Mouse 30                       | 4.88                            |
| Mouse 6                                                               | 16.87                           | Mouse 18                      | 15.51                           | Mouse 31                       | 3.78                            |
| Mouse 7                                                               | 80.26                           | Mouse 19                      | 14.36                           | Mouse 32                       | 4.51                            |
| Mouse 8                                                               | 36.25                           | Mouse 20                      | 5.32                            | Mouse 33                       | 0.69                            |
| Mouse 9                                                               | 22.14                           | Mouse 21                      | 1.16                            | Mouse 34                       | 16.88                           |
| Mouse 10                                                              | 77.13                           | Mouse 22                      | 3.26                            | Mouse 35                       | 6.40                            |
| mouse 11                                                              | 28.95                           | Mouse 23                      | 0.00                            | Mouse 36                       | 4.40                            |
| Mouse 12                                                              | 251.73                          | Mouse 24                      | 77.88                           | Mouse 37                       | 17.37                           |
|                                                                       |                                 | Mouse 25                      | 19.03                           |                                |                                 |
| Mean                                                                  | 53.30                           | Mean                          | 16.78                           | Mean                           | 12.18                           |
| SE                                                                    | 19.36                           | SE                            | 5.64                            | SE                             | 5.10                            |
| <i>P</i>                                                              |                                 |                               | 0.037                           |                                | 0.026                           |
| <i>P</i> (comparing vehicle and two treatment groups pooled together) |                                 |                               |                                 |                                | 0.010                           |

**Table S15.** MDA PCa 118b tumor-bearing mice assessed by dynamic contrast-enhanced MRI after 7 days of dovitinib.

| Vehicle   |                   | Low dovitinib dose (40 mg/kg) |                   | High dovitinib dose (60 mg/kg) |                   |
|-----------|-------------------|-------------------------------|-------------------|--------------------------------|-------------------|
| Sample ID | Tumor Enhancement | Sample ID                     | Tumor Enhancement | Sample ID                      | Tumor Enhancement |
| Mouse 1   | 7.108             | Mouse 7                       | 2.484             | Mouse 13                       | 1.934             |
| Mouse 2   | 8.135             | Mouse 8                       | 2.929             | Mouse 14                       | 2.820             |
| Mouse 3   | 8.798             | Mouse 9                       | 6.387             | Mouse 15                       | 5.557             |
| Mouse 4   | 11.232            | Mouse 10                      | 4.256             | Mouse 16                       | 5.403             |
| Mouse 5   | 7.269             | mouse 11                      | 2.989             | Mouse 17                       | 3.002             |
| Mouse 6   | 10.164            | Mouse 12                      | 1.598             | Mouse 18                       | 2.030             |
|           |                   |                               |                   |                                |                   |
| Mean      | 8.784             | Mean                          | 3.440             | Mean                           | 3.458             |
| SE        | 0.67              | SE                            | 0.69              | SE                             | 0.66              |
| <i>P</i>  |                   |                               | 0.0002            |                                | 0.00021           |

**Table S16.** Tumor volumes in tumor-bearing mice assessed by T2-weighted fast spin echo MRI after 3 weeks of dovitinib.

| MDA PCa 118b |                                 |           |                                 | MDA PCa 183 |                                 |           |                                 |
|--------------|---------------------------------|-----------|---------------------------------|-------------|---------------------------------|-----------|---------------------------------|
| Vehicle      |                                 | Dovitinib |                                 | Vehicle     |                                 | Dovitinib |                                 |
| Sample ID    | Tumor Volume (mm <sup>3</sup> ) | Sample ID | Tumor Volume (mm <sup>3</sup> ) | Sample ID   | Tumor Volume (mm <sup>3</sup> ) | Sample ID | Tumor Volume (mm <sup>3</sup> ) |
| Mouse 1      | 43.95                           | Mouse 9   | 8.89                            | Mouse 1     | 10.74                           | Mouse 9   | 2.10                            |
| Mouse 2      | 51.93                           | Mouse 10  | 1.42                            | Mouse 2     | 4.35                            | Mouse 10  | 6.57                            |
| Mouse 3      | 86.08                           | Mouse 11  | 23.93                           | Mouse 3     | 8.08                            | Mouse 11  | 6.57                            |
| Mouse 4      | 58.45                           | Mouse 12  | 11.23                           | Mouse 4     | 1.83                            | Mouse 12  | 6.40                            |
| Mouse 5      | 21.46                           | Mouse 13  | 12.87                           | Mouse 5     | 4.00                            | Mouse 13  | 2.83                            |
| Mouse 6      | 93.36                           | Mouse 14  | 6.54                            | Mouse 6     | 1.44                            | Mouse 14  | 6.84                            |
| Mouse 7      | 45.63                           | Mouse 15  | 10.47                           | Mouse 7     | 34.35                           | Mouse 15  | 28.86                           |
| Mouse 8      | 26.12                           | Mouse 16  | 8.57                            | Mouse 8     | 6.52                            | Mouse 16  | 7.69                            |
|              |                                 |           |                                 |             |                                 |           |                                 |
| Mean         | 53.37                           |           | 10.49                           | Mean        | 8.91                            |           | 8.48                            |
| SE           | 9.07                            |           | 2.28                            | SD          | 3.8                             |           | 2.99                            |
| P            |                                 |           | 0.0004                          | P           |                                 |           | 0.93                            |

| <b>Table S17.</b> Characteristics of the 34 men enrolled in the dovitinib clinical trial |                       |              |
|------------------------------------------------------------------------------------------|-----------------------|--------------|
| <b>Characteristic</b>                                                                    | <b>Median (range)</b> | <b>n (%)</b> |
| Age, years                                                                               | 68 (57–78)            |              |
| Race                                                                                     |                       |              |
| Caucasian                                                                                |                       | 28 (82)      |
| African American                                                                         |                       | 4 (12)       |
| Hispanic                                                                                 |                       | 2 (6)        |
| <i>Eastern Cooperative Oncology Group</i> performance status score                       |                       |              |
| 0                                                                                        |                       | 11 (32)      |
| 1                                                                                        |                       | 20 (59)      |
| 2                                                                                        |                       | 3 (9)        |
| Prior cytotoxic chemotherapy regimens                                                    |                       |              |
| 0                                                                                        |                       | 8 (25)       |
| 1                                                                                        |                       | 12 (35)      |
| 2                                                                                        |                       | 7 (20)       |
| 3                                                                                        |                       | 7 (20)       |
| Prostate-specific antigen concentration, ng/mL                                           | 140.3 (7.4-3,229.8)   |              |
| Bone-specific alkaline phosphatase concentration, µg/L                                   | 54 (13–416)           |              |
| Extent of bone metastases                                                                |                       |              |
| <10                                                                                      |                       | 7 (20)       |
| ≥10 to <20                                                                               |                       | 6 (18)       |
| >20                                                                                      |                       | 21 (62)      |
| Visceral metastases                                                                      |                       |              |
| None                                                                                     |                       | 19 (56)      |
| Lymph nodes                                                                              |                       | 14 (41)      |
| Liver                                                                                    |                       | 4 (12)       |

**Table S18.** Toxicity events among 34 men enrolled in the dovitinib clinical trial

| <b>Event</b>                       | <b>Grade 1</b> | <b>Grade 2</b> | <b>Grade 3</b> | <b>Grade 4</b> | <b>Number of patients</b> | <b>% of patients</b> |
|------------------------------------|----------------|----------------|----------------|----------------|---------------------------|----------------------|
| Fatigue                            | 9              | 13             | 3              | 0              | 25                        | 74                   |
| Diarrhea                           | 18             | 6              | 0              | 0              | 24                        | 71                   |
| Nausea                             | 11             | 5              | 1              | 0              | 17                        | 50                   |
| Anorexia                           | 6              | 6              | 0              | 0              | 12                        | 35                   |
| Rash                               | 6              | 5              | 1              | 0              | 12                        | 35                   |
| Vomiting                           | 10             | 2              | 0              | 0              | 12                        | 35                   |
| Weakness                           | 1              | 6              | 3              | 0              | 9                         | 26                   |
| Anemia                             | 1              | 6              | 1              | 0              | 8                         | 24                   |
| Elevated gamma-glutamyltransferase | 3              | 2              | 2              | 0              | 7                         | 21                   |
| Elevated alkaline phosphatase      | 1              | 2              | 2              | 0              | 5                         | 15                   |
| Thromboembolism                    | 0              | 1              | 1              | 0              | 2                         | 6                    |
| Hypertension                       | 0              | 0              | 1              | 0              | 1                         | 3                    |

**Table S19.** Findings from immunohistochemical analyses of bone biopsies obtained from men in the dovitinib trial at baseline and after 8 weeks of treatment

| Patient ID                                                                                                                            | Time of biopsy | Prostate Cancer |        |       |        | Tumor-associated osteoblasts |         |        |        |
|---------------------------------------------------------------------------------------------------------------------------------------|----------------|-----------------|--------|-------|--------|------------------------------|---------|--------|--------|
|                                                                                                                                       |                | FGFR1           | p-MAPK | p-S6K | p-FRS2 | FGFR1                        | p-MAPK  | p-S6K  | p-FRS2 |
| 1                                                                                                                                     | Bsl            | ++              | +++    | +++   | ND     | +                            | +       | +      | ND     |
|                                                                                                                                       | 8 weeks        | -               | ++     | +++   |        | onp                          | onp     | onp    |        |
| 2                                                                                                                                     | Bsl            | +               | +++    | +++   | ND     | few +                        | -       | few +  | ND     |
|                                                                                                                                       | 8 weeks        | -               | +++    | +++   |        | -                            | -       | few +  |        |
| 3                                                                                                                                     | Bsl            | +               | +++    | +++   | ND     | onp                          | onp     | onp    | ND     |
|                                                                                                                                       | 8 weeks        | -               | +++    | +++   |        | weak +                       | +       | few +  |        |
| 4                                                                                                                                     | Bsl            | -               | +++    | ND    | +/+++  | +                            | onp     | ND     | -      |
|                                                                                                                                       | 8 weeks        | -               | +++    |       | ++     | onp                          | onp     |        | onp    |
| 5                                                                                                                                     | Bsl            | -               | +/+++  | ND    | +      | +                            | onp     | ND     | onp    |
|                                                                                                                                       | 8 weeks        | -               | +++    |       | -      | onp                          | -       |        | -      |
| 6                                                                                                                                     | Bsl            | -               | +++    | -     | ND     | onp                          | onp     | onp    | ND     |
|                                                                                                                                       | 8 weeks        | -               | +/+++  | ++    |        | weak +                       | focal + | +      |        |
| 7                                                                                                                                     | Bsl            | -               | +++    | -     | ND     | -                            | onp     | -      | ND     |
|                                                                                                                                       | 8 weeks        | +               | +++    | ++    |        | onp                          | onp     | onp    |        |
| In the cases below, tissues derived from bone biopsy after 8 weeks of treatment did not contain PCa cells and thus were not evaluated |                |                 |        |       |        |                              |         |        |        |
| 8                                                                                                                                     | Bsl            | +               | -      | -     | ND     | onp                          | onp     | onp    | ND     |
| 9                                                                                                                                     | Bsl            | -               | +++    | ND    | 0      | +                            | -       | ND     | -      |
| 10                                                                                                                                    | Bsl            | -               | +++    | ND    | +      | -                            | -       | ND     | -      |
| 11                                                                                                                                    | Bsl            | -               | +      | ND    | +/+++  | +                            | onp     | ND     | -      |
| 12                                                                                                                                    | Bsl            | -               | +++    | -     | ND     | -                            | -       | weak + | ND     |
| 13                                                                                                                                    | Bsl            | -               | +++    | +++   | ND     | -                            | +       | few +  | ND     |
| 14                                                                                                                                    | Bsl            | -               | +++    | +++   | ND     | -                            | weak +  | +      | ND     |
| 15                                                                                                                                    | Bsl            | -               | +++    | +++   | ND     | onp                          | onp     | onp    | ND     |
| 16                                                                                                                                    | Bsl            | -               | +++    | +++   | ND     | onp                          | onp     | onp    | ND     |

Bsl, baseline; ND, not determined; onp, osteoblasts not present for evaluation
